# Supplementary material for: Epitaxial growth via anti-solvent-induced deposition towards a highly efficient and stable Mn4+ doped fluoride red phosphor for application in warm WLEDs
Source: Royal Society of Chemistry journal article supplement (doi:10.1039/c9tc01433k), 2019-01-01
Supplement: c9tc01433k1.pdf [file c9tc01433k1.pdf]

**Epitaxial Growth via Anti-solvent-induced Deposition towards Highly Efficient and Stable Mn<sup>4+</sup> Doped Fluoride Red Phosphor in Application of Warm WLED**

Chunyan Jiang,<sup>1</sup> Lihua Li,<sup>1</sup> Mikhail G. Brik,<sup>234</sup> Litian Lin,<sup>5</sup> Mingying Peng\*<sup>1</sup>

1 The China-Germany Research Center for Photonic Materials and Device, State Key Laboratory of Luminescent Materials and Devices, Guangdong Provincial Key Laboratory of Fiber Laser Materials and Applied Techniques, School of Materials Science and Engineering, South China University of Technology, Guangzhou 510641, P. R. China

2 College of Mathematics and Physics, Chongqing University of Posts and Telecommunications, Chongqing 400065, P. R. China

3 Institute of Physics, University of Tartu, W. Ostwald Str. 1, Tartu 50411, Estonia

4 Institute of Physics, Jan Długosz University, Armii Krajowej 13/15, Częstochowa PL-42200, Poland

5 Guangdong Research Institute of Rare Metals, Guangzhou 510651, P. R. China

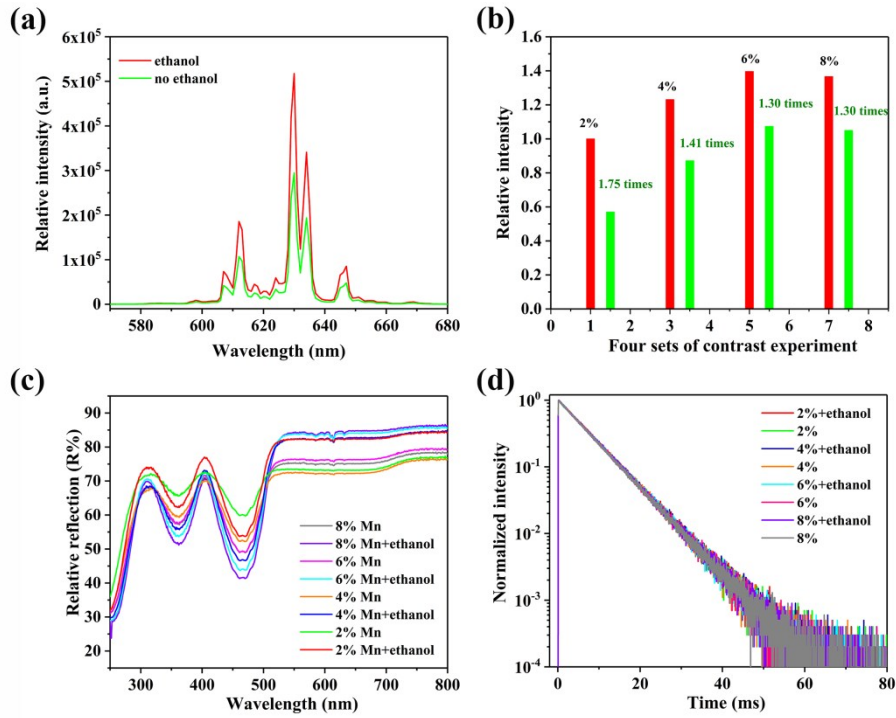

**Figure S1** (a) The effect of ethanol addition on the photoluminescence emission spectra of  $K_2GeF_6:0.02Mn^{4+}$ . (b) Photoluminescence emission intensity, (c) time-resolved decay curve and (d) diffuse spectra changes (with and without ethanol addition) of  $K_2GeF_6$  with different  $Mn^{4+}$  doping concentrations.

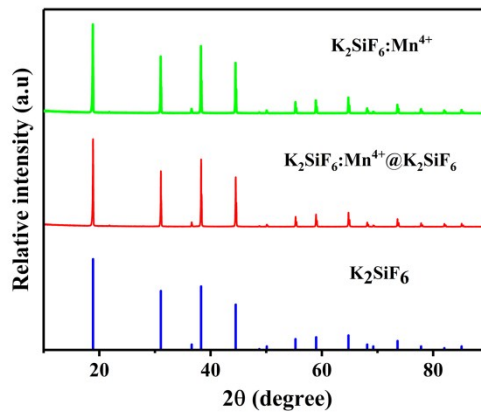

**Figure S2** XRD patterns of  $K_2SiF_6:Mn^{4+}$  and  $K_2SiF_6:Mn^{4+}@K_2SiF_6$ .

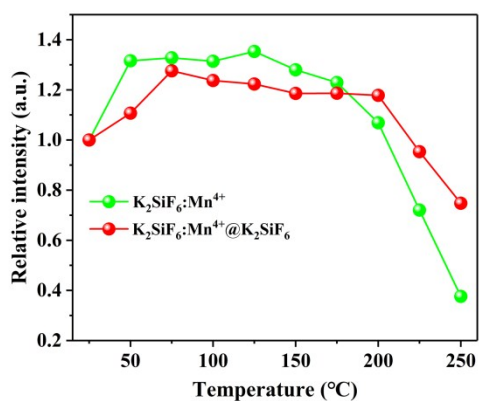

**Figure S3** Temperature dependent integral intensity of  $K_2SiF_6:Mn^{4+}$  and  $K_2SiF_6:Mn^{4+}@K_2SiF_6$ .

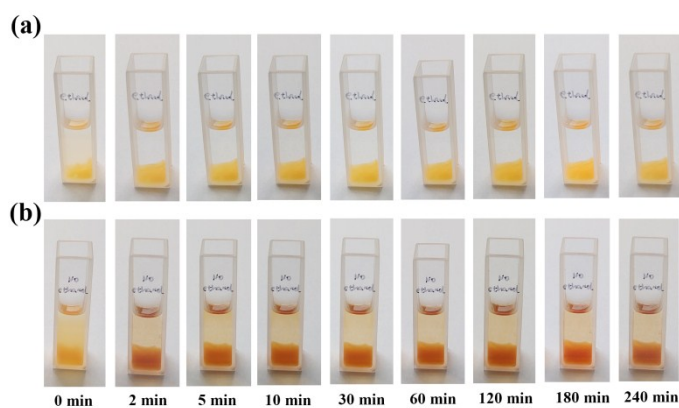

**Figure S4** Photographs of water immersed  $K_2SiF_6:Mn^{4+}$  after exposed to saturated  $K_2SiF_6/HF$  solution (a) with ethanol and (b) without ethanol.

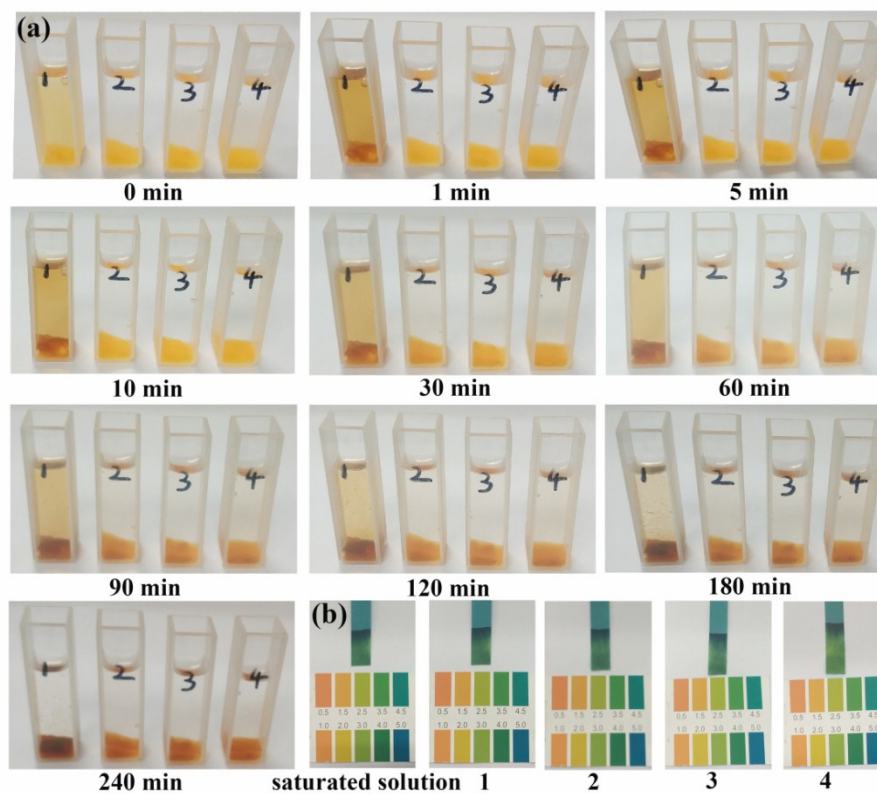

**Figure S5** (a) Photographs of  $\text{K}_2\text{SiF}_6:\text{Mn}^{4+}$  immersed in (1) 0 g/3 mL (2) 0.012 g/3 mL (3) 0.024 g/3 mL (4) 0.036 g/3 mL saturated  $\text{K}_2\text{SiF}_6/\text{H}_2\text{O}$  solutions for 0, 1, 5, 10, 30, 60, 90, 120, 180, 240 min. (b) pH test strip to illustrate the pH value of saturated  $\text{K}_2\text{SiF}_6/\text{H}_2\text{O}$  solutions and  $\text{K}_2\text{SiF}_6:\text{Mn}^{4+}$  after immersed in the above 4 concentrations of  $\text{K}_2\text{SiF}_6/\text{H}_2\text{O}$  solution.
